# Supplementary material
Source: publisher figshare collection journal article supplement (https://acs.figshare.com/ndownloader/files/4764286)
Supplement: Supplementary file 1 [file 4764286]

## SUPPORTING INFORMATION

### Synthesis of a Catechol-based Poly(ether ether ketone) ("*ortho*-PEEK") by Classical Step-Growth Polymerization and by Entropically-Driven Ring-Opening Polymerization of Macrocyclic Oligomers

Abderrazak Ben-Haida,<sup>†</sup> Howard M. Colquhoun,<sup>\*‡</sup> Philip Hodge<sup>\*†</sup> and David J. Williams<sup>\*§</sup>

<sup>†</sup> Department of Chemistry, University of Manchester, Oxford Road, Manchester, M13 9PL, UK

<sup>‡</sup> Department of Chemistry, University of Reading, Whiteknights, Reading, UK RG6 6AD, UK

<sup>§</sup> Department of Chemistry, Imperial College, South Kensington, London, UK SW7 2AY, UK

#### 1. Thermal ellipsoid plot (50% probability) for the X-ray structure of cyclic dimer 3a

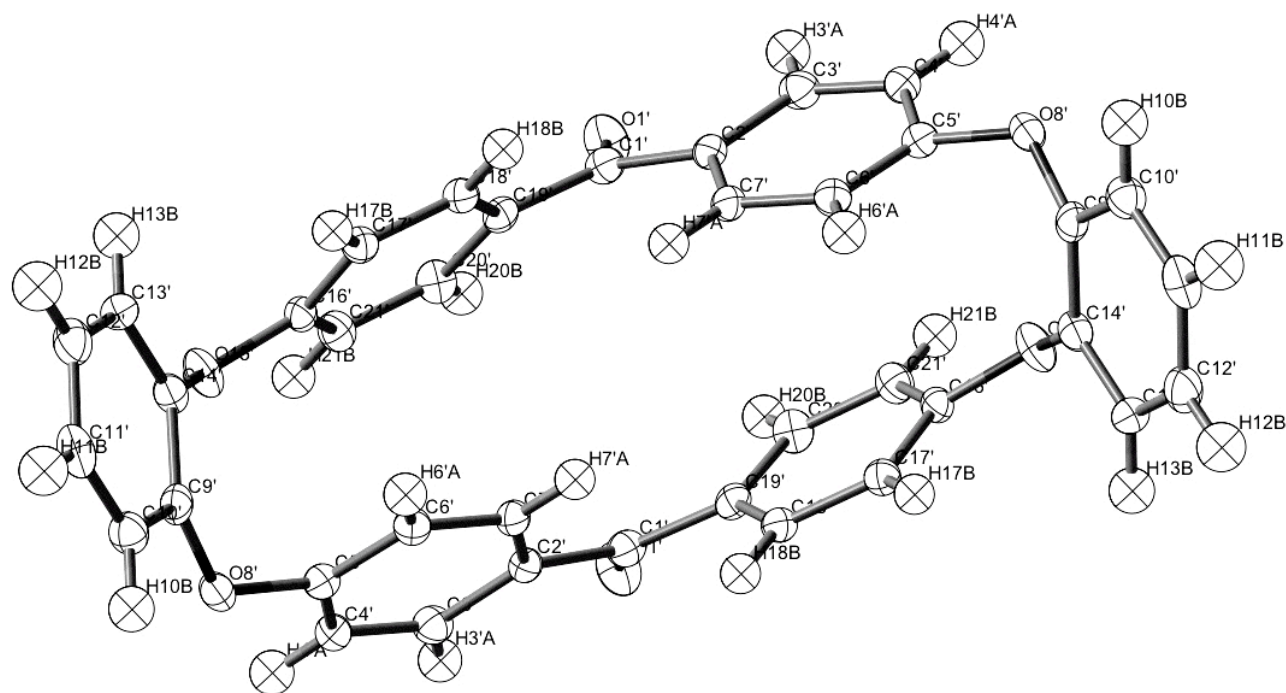

2. Thermal ellipsoid plot (50% probability) for the X-ray structure of the cyclic tetramer **3c**

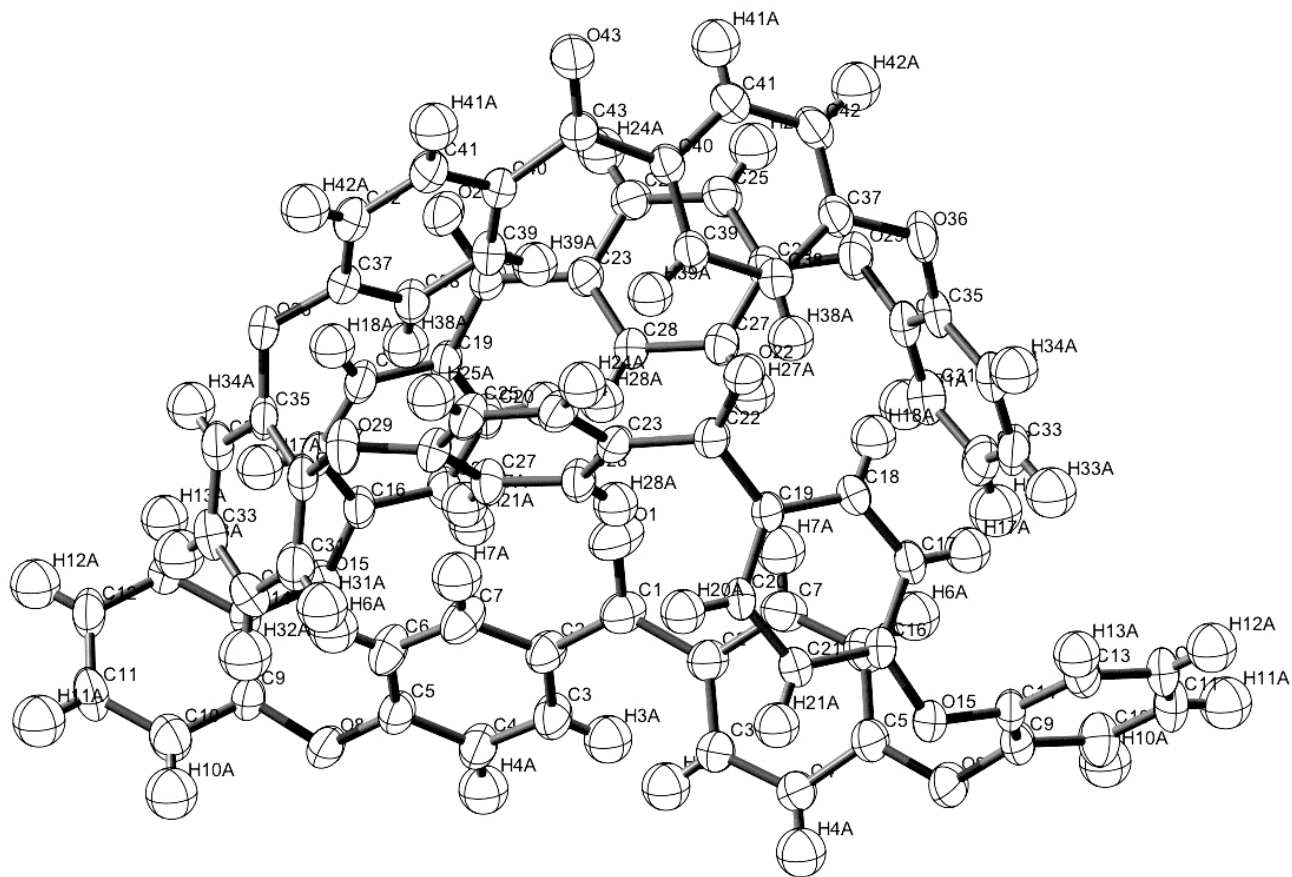

**NOTE:** Full crystallographic data for the structures of **3a** and **3c** are available in CIF format. This material is available free of charge via the internet at <http://pubs.acs.org>.
